# Supplementary material
Source: MDPI journal article supplement (https://www.mdpi.com/2071-1050/10/3/715)
Supplement: s1 [file s1]

## Supplementary Materials: Assumptions and sources

This material shows the data sources used and assumptions proposed for the estimation of natural capital in Uruguay from 1870 to 2014.

### *Crops*

| Item       | Period      | Assumptions and Sources          |                                                                                                                                 |
|------------|-------------|----------------------------------|---------------------------------------------------------------------------------------------------------------------------------|
| Corn       | 1870 - 1873 | [1]                              | The original data is measured in bushels. It is assumed that each bushel of corn weighs 65 kilograms.                           |
|            | 1874 - 1880 | Interpolation                    |                                                                                                                                 |
|            | 1881        | [2]                              |                                                                                                                                 |
|            | 1882 - 1891 | Interpolation                    |                                                                                                                                 |
|            | 1892 - 1893 | Statistical Yearbooks of Uruguay |                                                                                                                                 |
|            | 1894 - 1899 | Interpolation                    |                                                                                                                                 |
|            | 1900 - 1903 | Agricultural Statistics 1916     |                                                                                                                                 |
|            | 1904        | Interpolation                    |                                                                                                                                 |
|            | 1905 - 1916 | Agricultural Statistics 1916     |                                                                                                                                 |
|            | 1917 - 1932 | Statistical Yearbooks of Uruguay |                                                                                                                                 |
|            | 1933 - 1960 | Statistical Supplement BROU 1960 |                                                                                                                                 |
|            | 1961 - 2014 | FAOSTAT                          |                                                                                                                                 |
| Green Corn | 1870 - 1960 | It is assumed zero.              |                                                                                                                                 |
|            | 1961 - 2014 | FAOSTAT                          |                                                                                                                                 |
| Rice       | 1870 - 1935 | It is assumed zero. See [3].     |                                                                                                                                 |
|            | 1936 - 1960 | Statistical Supplement BROU 1960 |                                                                                                                                 |
|            | 1961 - 2014 | FAOSTAT                          |                                                                                                                                 |
| Wheat      | 1870 - 1891 | [4]                              |                                                                                                                                 |
|            | 1892 - 1893 | Statistical yearbooks of Uruguay | The original data is measured in hectolitres. It is assumed that one hectolitre equals 78 kilograms of wheat. See [5] ( p. 951) |
|            | 1894 - 1903 | Statistical Yearbooks of Uruguay |                                                                                                                                 |
|            | 1904        | Interpolation                    |                                                                                                                                 |
|            | 1905 - 1909 | Statistical Yearbooks of Uruguay |                                                                                                                                 |

|                  |             |                                                                                                                       |                                                                                                                                 |
|------------------|-------------|-----------------------------------------------------------------------------------------------------------------------|---------------------------------------------------------------------------------------------------------------------------------|
|                  | 1910        | Interpolation                                                                                                         |                                                                                                                                 |
|                  | 1911 - 1935 | Statistical Yearbooks of Uruguay                                                                                      |                                                                                                                                 |
|                  | 1936 - 1960 | Statistical Supplement BROU 1960                                                                                      |                                                                                                                                 |
|                  | 1961 - 2014 | FAOSTAT                                                                                                               |                                                                                                                                 |
| Barley           | 1870 - 1891 | Production in this period was estimated assuming that its evolution over time is equal to that of wheat.              |                                                                                                                                 |
|                  | 1892 - 1893 | Statistical Yearbooks of Uruguay                                                                                      | The original data is measured in hectolitres. It is assumed that one hectolitre equals 64 kilograms of barley. See [5] ( p 951) |
|                  | 1894 - 1898 | [6]                                                                                                                   |                                                                                                                                 |
|                  | 1899 - 1933 | Statistical Yearbooks of Uruguay                                                                                      |                                                                                                                                 |
|                  | 1934 - 1960 | Statistical Supplement BROU 1960                                                                                      |                                                                                                                                 |
|                  | 1961 - 2014 | FAOSTAT                                                                                                               |                                                                                                                                 |
|                  |             |                                                                                                                       |                                                                                                                                 |
| Soy              | 1870 - 1960 | It is assumed zero.                                                                                                   |                                                                                                                                 |
|                  | 1961 - 2014 | FAOSTAT                                                                                                               |                                                                                                                                 |
| Rape             | 1870 - 1960 | It is assumed zero.                                                                                                   |                                                                                                                                 |
|                  | 1961 - 2014 | FAOSTAT                                                                                                               |                                                                                                                                 |
| Grapes           | 1870 - 1903 | [6]                                                                                                                   |                                                                                                                                 |
|                  | 1904 - 1960 | Statistical Yearbooks of Uruguay                                                                                      |                                                                                                                                 |
|                  | 1961 - 2014 | FAOSTAT                                                                                                               |                                                                                                                                 |
| Apple and Olives | 1870 - 1907 | The production in this period was estimated assuming that its evolution over time is equal to that of the population. |                                                                                                                                 |
|                  | 1908        | Statistical yearbooks of Uruguay                                                                                      |                                                                                                                                 |
|                  | 1909 - 1915 | Interpolation                                                                                                         |                                                                                                                                 |
|                  | 1916        | Statistical Yearbooks of Uruguay                                                                                      | The original data is in drawers. It is assumed that each box of apples weighs 21 kilograms and that of olive 28.                |
|                  | 1917 - 1945 | Interpolation                                                                                                         |                                                                                                                                 |
|                  | 1946        | Statistical Yearbooks of Uruguay                                                                                      |                                                                                                                                 |
|                  | 1947 - 1950 | Interpolation                                                                                                         |                                                                                                                                 |
|                  | 1951        | Statistical Yearbooks of Uruguay                                                                                      |                                                                                                                                 |
|                  | 1952 - 1955 | Interpolation                                                                                                         |                                                                                                                                 |
|                  |             |                                                                                                                       |                                                                                                                                 |

|                             |             |                                                                                                                       |
|-----------------------------|-------------|-----------------------------------------------------------------------------------------------------------------------|
|                             | 1956        | Statistical Yearbooks of Uruguay                                                                                      |
|                             | 1957 - 1960 | Interpolation                                                                                                         |
|                             | 1961 - 2014 | FAOSTAT                                                                                                               |
| Quince                      | 1870 - 1945 | The production in this period was estimated assuming that its evolution over time is equal to that of the peach.      |
|                             | 1946        | Statistical Yearbooks of Uruguay                                                                                      |
|                             | 1947 - 1950 | Interpolation                                                                                                         |
|                             | 1951        | Statistical Yearbooks of Uruguay                                                                                      |
|                             | 1952 - 1955 | Interpolation                                                                                                         |
|                             | 1956        | Statistical Yearbooks of Uruguay                                                                                      |
|                             | 1957 - 1960 | Interpolation                                                                                                         |
|                             | 1961 - 2014 | FAOSTAT                                                                                                               |
| Pear                        | 1870 - 1907 | The production in this period was estimated assuming that its evolution over time is equal to that of the apple.      |
|                             | 1908        | Statistical Yearbooks of Uruguay                                                                                      |
|                             | 1909 - 1915 | Interpolation                                                                                                         |
|                             | 1916        | Statistical Yearbooks of Uruguay                                                                                      |
|                             | 1917 - 1945 | Interpolation                                                                                                         |
|                             | 1946        | Statistical Yearbooks of Uruguay                                                                                      |
|                             | 1947 - 1950 | Interpolation                                                                                                         |
|                             | 1951        | Statistical Yearbooks of Uruguay                                                                                      |
|                             | 1952 - 1955 | Interpolation                                                                                                         |
|                             | 1956        | Statistical yearbooks of Uruguay                                                                                      |
|                             | 1957 - 1960 | Interpolation                                                                                                         |
|                             | 1961 - 2014 | FAOSTAT                                                                                                               |
| Orange, Plum and Vegetables | 1870 - 1907 | The production in this period was estimated assuming that its evolution over time is equal to that of the population. |
|                             | 1908        | Statistical Yearbooks of Uruguay                                                                                      |
|                             | 1909 - 1915 | Interpolation                                                                                                         |
|                             | 1916        | Statistical Yearbooks of Uruguay                                                                                      |
|                             | 1917 - 1926 | Interpolation                                                                                                         |
|                             | 1927        | Statistical Yearbooks of Uruguay                                                                                      |
|                             | 1928 - 1929 | Interpolation                                                                                                         |
|                             | 1930        | Statistical Yearbooks of Uruguay                                                                                      |
|                             | 1931 - 1932 | Interpolation                                                                                                         |
|                             | 1933        | Statistical Yearbooks of Uruguay                                                                                      |
|                             | 1934 - 1936 | Interpolation                                                                                                         |
|                             | 1937        | Statistical Yearbooks of Uruguay                                                                                      |
|                             | 1938 - 1945 | Interpolation                                                                                                         |
|                             | 1946        | Statistical Yearbooks of Uruguay                                                                                      |
|                             | 1947 - 1950 | Interpolation                                                                                                         |
|                             | 1951        | Statistical Yearbooks of Uruguay                                                                                      |

|                             |             |                                                                                                                       |                                                                                                                           |
|-----------------------------|-------------|-----------------------------------------------------------------------------------------------------------------------|---------------------------------------------------------------------------------------------------------------------------|
|                             | 1952 - 1955 | Interpolation                                                                                                         |                                                                                                                           |
|                             | 1956        | Statistical Yearbooks of Uruguay                                                                                      |                                                                                                                           |
|                             | 1957 - 1960 | Interpolation                                                                                                         |                                                                                                                           |
|                             | 1961 - 2014 | FAOSTAT                                                                                                               |                                                                                                                           |
| Lemon,<br>Lime and<br>Peach | 1870 - 1907 | Production in this period was estimated assuming that its evolution over time is equal to that of orange.             |                                                                                                                           |
|                             | 1908        | Statistical Yearbooks of Uruguay                                                                                      |                                                                                                                           |
|                             | 1909 - 1915 | Interpolation                                                                                                         |                                                                                                                           |
|                             | 1916        | Statistical Yearbooks of Uruguay                                                                                      | The original data is in drawers. It is assumed that each box of lemon and limes weighs 23 kilograms and that of peach 25. |
|                             | 1917 - 1945 | Interpolation                                                                                                         |                                                                                                                           |
|                             | 1946        | Statistical Yearbooks of Uruguay                                                                                      |                                                                                                                           |
|                             | 1947 - 1950 | Interpolation                                                                                                         |                                                                                                                           |
|                             | 1951        | Statistical Yearbooks of Uruguay                                                                                      |                                                                                                                           |
|                             | 1952 - 1955 | Interpolation                                                                                                         |                                                                                                                           |
|                             | 1956        | Statistical Yearbooks of Uruguay                                                                                      |                                                                                                                           |
|                             | 1957 - 1960 | Interpolation                                                                                                         |                                                                                                                           |
|                             | 1961 - 2014 | FAOSTAT                                                                                                               |                                                                                                                           |
|                             |             |                                                                                                                       |                                                                                                                           |
| Tangerine                   | 1870 - 1945 | Production in this period was estimated assuming that its evolution over time is equal to that of orange.             |                                                                                                                           |
|                             | 1946        | Statistical Yearbooks of Uruguay                                                                                      |                                                                                                                           |
|                             | 1947 - 1950 | Interpolation                                                                                                         |                                                                                                                           |
|                             | 1951        | Statistical Yearbooks of Uruguay                                                                                      |                                                                                                                           |
|                             | 1952 - 1955 | Interpolation                                                                                                         |                                                                                                                           |
|                             | 1956        | Statistical Yearbooks of Uruguay                                                                                      |                                                                                                                           |
|                             | 1957 - 1960 | Interpolation                                                                                                         |                                                                                                                           |
|                             | 1961 - 2014 | FAOSTAT                                                                                                               |                                                                                                                           |
| Grapefruit                  | 1870 - 1955 | Production in this period was estimated assuming that its evolution over time is equal to that of orange.             |                                                                                                                           |
|                             | 1956        | Statistical Yearbooks of Uruguay                                                                                      |                                                                                                                           |
|                             | 1957 - 1960 | Interpolation                                                                                                         |                                                                                                                           |
|                             | 1961 - 2014 | FAOSTAT                                                                                                               |                                                                                                                           |
| Garlic and<br>Onion         | 1870 – 1941 | The production in this period was estimated assuming that its evolution over time is equal to that of the population. |                                                                                                                           |
|                             | 1942 - 1949 | Statistical Yearbooks of Uruguay                                                                                      |                                                                                                                           |
|                             | 1950        | Interpolation                                                                                                         |                                                                                                                           |
|                             | 1951        | Statistical Yearbooks of Uruguay                                                                                      |                                                                                                                           |

|                                         |             |                                                                                                                       |                                                                                                                                        |
|-----------------------------------------|-------------|-----------------------------------------------------------------------------------------------------------------------|----------------------------------------------------------------------------------------------------------------------------------------|
|                                         | 1952 - 1955 | Interpolation                                                                                                         |                                                                                                                                        |
|                                         | 1956        | Statistical Yearbooks of Uruguay                                                                                      |                                                                                                                                        |
|                                         | 1957 - 1960 | Interpolation                                                                                                         |                                                                                                                                        |
|                                         | 1961 - 2014 | FAOSTAT                                                                                                               |                                                                                                                                        |
| Cotton                                  | 1870 - 1950 | It is assumed zero. See [7] (p. 5).                                                                                   |                                                                                                                                        |
|                                         | 1951        | Statistical yearbooks of Uruguay                                                                                      |                                                                                                                                        |
|                                         | 1952 - 1955 | Interpolation                                                                                                         |                                                                                                                                        |
|                                         | 1956        | Statistical Yearbooks of Uruguay                                                                                      |                                                                                                                                        |
|                                         | 1957 - 1960 | Interpolation                                                                                                         |                                                                                                                                        |
|                                         | 1961 - 2014 | FAOSTAT                                                                                                               |                                                                                                                                        |
| Birdseed,<br>Oats and<br>Flax           | 1870 - 1891 | It is assumed zero.                                                                                                   |                                                                                                                                        |
|                                         | 1892 - 1893 | Statistical Yearbooks of Uruguay                                                                                      | The original data is measured in hectolitres. It is assumed that one hectolitre equals 78 kilograms of birdseed, oats and flax.        |
|                                         | 1894 - 1898 | [6]                                                                                                                   |                                                                                                                                        |
|                                         | 1899 - 1933 | Statistical Yearbooks of Uruguay                                                                                      |                                                                                                                                        |
|                                         | 1934 - 1960 | Statistical Supplement BROU 1960                                                                                      |                                                                                                                                        |
|                                         | 1961 - 2014 | FAOSTAT                                                                                                               |                                                                                                                                        |
|                                         |             |                                                                                                                       |                                                                                                                                        |
| Sweet<br>Potato,<br>Potato and<br>Beans | 1870 - 1891 | The production in this period was estimated assuming that its evolution over time is equal to that of the population. |                                                                                                                                        |
|                                         | 1892 - 1893 | Statistical Yearbooks of Uruguay                                                                                      | The original data is measured in hectolitres. It is assumed that one hectolitre equals 78 kilograms of sweet potato, potato and beans. |
|                                         | 1894 - 1915 | Interpolation                                                                                                         |                                                                                                                                        |
|                                         | 1916 - 1954 | Statistical Yearbooks of Uruguay                                                                                      |                                                                                                                                        |
|                                         | 1955        | Interpolation                                                                                                         |                                                                                                                                        |
|                                         | 1956        | Statistical Yearbooks of Uruguay                                                                                      |                                                                                                                                        |
|                                         | 1957        | Interpolation                                                                                                         |                                                                                                                                        |
|                                         | 1958        | Statistical Yearbooks of Uruguay                                                                                      |                                                                                                                                        |
|                                         | 1959 - 1960 | Interpolation                                                                                                         |                                                                                                                                        |
|                                         | 1961 - 2014 | FAOSTAT                                                                                                               |                                                                                                                                        |
| Pumpkin<br>and Bell<br>Pepper           | 1870 - 1945 | The production in this period was estimated assuming that its evolution over time is equal to that of the population. |                                                                                                                                        |
|                                         | 1946        | Statistical Yearbooks of Uruguay                                                                                      |                                                                                                                                        |
|                                         |             |                                                                                                                       |                                                                                                                                        |

|                      |             |                                                                                                                       |
|----------------------|-------------|-----------------------------------------------------------------------------------------------------------------------|
|                      | 1947 - 1950 | Interpolation                                                                                                         |
|                      | 1951        | Statistical Yearbooks of Uruguay                                                                                      |
|                      | 1952 - 1955 | Interpolation                                                                                                         |
|                      | 1956        | Statistical Yearbooks of Uruguay                                                                                      |
|                      | 1957 - 1960 | Interpolation                                                                                                         |
|                      | 1961 - 2014 | FAOSTAT                                                                                                               |
| Sugar Cane           | 1870 - 1943 | It is assumed zero.                                                                                                   |
|                      | 1944 - 1949 | Statistical Yearbooks of Uruguay                                                                                      |
|                      | 1950        | Interpolation                                                                                                         |
|                      | 1951        | Statistical Yearbooks of Uruguay                                                                                      |
|                      | 1952 - 1955 | Interpolation                                                                                                         |
|                      | 1956        | Statistical Yearbooks of Uruguay                                                                                      |
|                      | 1957        | Interpolation                                                                                                         |
|                      | 1958        | Statistical Yearbooks of Uruguay                                                                                      |
|                      | 1959 - 1960 | Interpolation                                                                                                         |
|                      | 1961 - 2014 | FAOSTAT                                                                                                               |
| Peas                 | 1870 - 1941 | The production in this period was estimated assuming that its evolution over time is equal to that of the population. |
|                      | 1942 - 1949 | Statistical Yearbooks of Uruguay                                                                                      |
|                      | 1950        | Interpolation                                                                                                         |
|                      | 1951        | Statistical Yearbooks of Uruguay                                                                                      |
|                      | 1952 - 1955 | Interpolation                                                                                                         |
|                      | 1956        | Statistical Yearbooks of Uruguay                                                                                      |
|                      | 1957 - 1960 | Interpolation                                                                                                         |
|                      | 1961 - 2014 | FAOSTAT                                                                                                               |
| Beans and Vegetables | 1870 - 1945 | The production in this period was estimated assuming that its evolution over time is equal to that of the population. |
|                      | 1946 - 1950 | Interpolation                                                                                                         |
|                      | 1951        | Statistical Yearbooks of Uruguay                                                                                      |
|                      | 1952 - 1955 | Interpolation                                                                                                         |
|                      | 1956        | Statistical Yearbooks of Uruguay                                                                                      |
|                      | 1957 - 1960 | Interpolation                                                                                                         |
|                      | 1961 - 2014 | FAOSTAT                                                                                                               |
| String beans         | 1870 - 1950 | The production in this period was estimated assuming that its evolution over time is equal to that of the population. |
|                      | 1951        | Statistical Yearbooks of Uruguay                                                                                      |
|                      | 1952 - 1955 | Interpolation                                                                                                         |
|                      | 1956        | Statistical Yearbooks of Uruguay                                                                                      |
|                      | 1957 - 1960 | Interpolation                                                                                                         |
|                      | 1961 - 2014 | FAOSTAT                                                                                                               |
| Peanut               | 1870 - 1915 | It is assumed zero.                                                                                                   |

|                                      |                    |                                                                                                                       |
|--------------------------------------|--------------------|-----------------------------------------------------------------------------------------------------------------------|
|                                      | <b>1916</b>        | Statistical Yearbooks of Uruguay                                                                                      |
|                                      | <b>1917</b>        | Interpolation                                                                                                         |
|                                      | <b>1918 - 1936</b> | Statistical Yearbooks of Uruguay                                                                                      |
|                                      | <b>1937 - 1960</b> | Statistical Supplement BROU 1960                                                                                      |
|                                      | <b>1961 - 2014</b> | FAOSTAT                                                                                                               |
| <b>Sunflower Seeds</b>               | <b>1870 - 1935</b> | It is assumed zero. See [8] (p. 25).                                                                                  |
|                                      | <b>1936 - 1960</b> | Statistical Yearbooks of Uruguay                                                                                      |
|                                      | <b>1961 - 2014</b> | FAOSTAT                                                                                                               |
| <b>Sorghum</b>                       | <b>1870 - 1919</b> | It is assumed zero.                                                                                                   |
|                                      | <b>1920 - 1954</b> | Statistical yearbooks of Uruguay                                                                                      |
|                                      | <b>1955 - 1960</b> | Interpolation                                                                                                         |
|                                      | <b>1961 - 2014</b> | FAOSTAT                                                                                                               |
| <b>Tobacco</b>                       | <b>1870 - 1904</b> | It is assumed zero. See [9] (p. 207) and [2] (pp. 301-302).                                                           |
|                                      | <b>1905 - 1949</b> | Statistical Yearbooks of Uruguay                                                                                      |
|                                      | <b>1950</b>        | Interpolation                                                                                                         |
|                                      | <b>1951</b>        | Statistical Yearbooks of Uruguay                                                                                      |
|                                      | <b>1952 - 1954</b> | Interpolation                                                                                                         |
|                                      | <b>1955 - 1960</b> | Statistical Yearbooks of Uruguay                                                                                      |
|                                      | <b>1961 - 2014</b> | FAOSTAT                                                                                                               |
| <b>Tomatoes, Carrots and Turnips</b> | <b>1870 - 1945</b> | The production in this period was estimated assuming that its evolution over time is equal to that of the population. |
|                                      | <b>1946</b>        | Statistical Yearbooks of Uruguay                                                                                      |
|                                      | <b>1947 - 1950</b> | Interpolation                                                                                                         |
|                                      | <b>1951</b>        | Statistical Yearbooks of Uruguay                                                                                      |
|                                      | <b>1952 - 1955</b> | Interpolation                                                                                                         |
|                                      | <b>1956</b>        | Statistical Yearbooks of Uruguay                                                                                      |
|                                      | <b>1957 - 1960</b> | Interpolation                                                                                                         |
|                                      | <b>1961 - 2014</b> | FAOSTAT                                                                                                               |
| <b>Melon and Watermelon</b>          | <b>1870 - 1907</b> | The production in this period was estimated assuming that its evolution over time is equal to that of the population. |
|                                      | <b>1908</b>        | Statistical Yearbooks of Uruguay                                                                                      |
|                                      | <b>1909 - 1945</b> | Interpolation                                                                                                         |
|                                      | <b>1946</b>        | Statistical Yearbooks of Uruguay                                                                                      |
|                                      | <b>1947 - 1950</b> | Interpolation                                                                                                         |
|                                      | <b>1951</b>        | Statistical Yearbooks of Uruguay                                                                                      |
|                                      | <b>1952 - 1955</b> | Interpolation                                                                                                         |
|                                      | <b>1956</b>        | Statistical Yearbooks of Uruguay                                                                                      |
|                                      | <b>1957 - 1960</b> | Interpolation                                                                                                         |
|                                      | <b>1961 - 2014</b> | FAOSTAT                                                                                                               |

## Pastureland

In this series, the production of meat includes the number of cattle slaughtered (Montevideo and the countryside considering factories, slaughterhouses and *saladeros*) and the export of live cattle. We try to add these components for all the years, however, not all of them were possible, especially after 1948, when statistical data tend to lose coherence. Once the quantity of animals slaughtered is calculated, the meat production is obtained from a percentage of meat extraction per animal.

The weight of the animals is calculated assuming 161 kilograms of meat per bovine and 23 kilograms per sheep. These extraction percentages are found in the statistical yearbooks surveyed.

| Item | Period                          |                                                              | Assumptions and Sources                                                                                                                                                            |
|------|---------------------------------|--------------------------------------------------------------|------------------------------------------------------------------------------------------------------------------------------------------------------------------------------------|
| Beef | 1870 - 1873 (number of animals) |                                                              | See [10] (p 113). In this period the disaggregated data of the slaughter of <i>saladeros</i> (factories for salted meat) was not found.                                            |
|      | 1874 - 1948                     | Supply of Montevideo (number of animals)                     | 1874 - 1900: Statistical Yearbooks of Uruguay                                                                                                                                      |
|      |                                 |                                                              | 1901 - 1933: [11]                                                                                                                                                                  |
|      |                                 |                                                              | 1934 - 1948: Statistical Yearbooks of Uruguay                                                                                                                                      |
|      |                                 | Supply of provinces excepting Montevideo (number of animals) | 1874 - 1905: It was assumed that the variation of the meat consumption of the provinces excepting Montevideo (capital of the country) is equal to the variation of the population. |
|      |                                 |                                                              | 1906 - 1933: [11]                                                                                                                                                                  |
|      |                                 |                                                              | 1934 - 1948: Statistical Yearbooks of Uruguay                                                                                                                                      |
|      |                                 | Slaughterhouse (number of animals)                           | 1874 - 1904: Data not available.                                                                                                                                                   |
|      |                                 |                                                              | 1905 - 1910: [12]                                                                                                                                                                  |
|      |                                 |                                                              | 1911 - 1935: [11]                                                                                                                                                                  |



|                                               |             |                                                                                                                                                                                                                              |                                                         |
|-----------------------------------------------|-------------|------------------------------------------------------------------------------------------------------------------------------------------------------------------------------------------------------------------------------|---------------------------------------------------------|
|                                               |             |                                                                                                                                                                                                                              |                                                         |
|                                               |             |                                                                                                                                                                                                                              | 1936 - 1948: Statistical Yearbooks of Uruguay           |
|                                               |             | Slaughter in <i>saladeros</i> (number of animals)                                                                                                                                                                            | 1874 - 1899: Statistical Yearbooks of Uruguay           |
|                                               |             |                                                                                                                                                                                                                              | 1900 - 1910: [12]                                       |
|                                               |             |                                                                                                                                                                                                                              | 1911 - 1935: [11]                                       |
|                                               |             |                                                                                                                                                                                                                              | 1936 - 1948: Statistical Yearbooks of Uruguay           |
|                                               |             |                                                                                                                                                                                                                              | Slaughter in meat processing plants (number of animals) |
|                                               |             | 1912 - 1935: [11]                                                                                                                                                                                                            |                                                         |
|                                               |             | 1936 - 1938: Statistical Yearbooks of Uruguay                                                                                                                                                                                |                                                         |
|                                               |             | 1939 - 1948: Data not available                                                                                                                                                                                              |                                                         |
|                                               |             | Live cattle exports (number of animals)                                                                                                                                                                                      | 1874 - 1875: Statistical Notebook No.8 (1877)           |
| 1876 - 1948: Statistical Yearbooks of Uruguay |             |                                                                                                                                                                                                                              |                                                         |
|                                               | 1949 - 1960 | In this period the statistics becomes cumbersome. The data of slaughtered animals is formed adding the activities reported in [13] and the consumption of meat in the countryside from the Statistical Yearbooks of Uruguay. |                                                         |
|                                               |             | 1961 – 2014                                                                                                                                                                                                                  | FAOSTAT                                                 |
| Sheep meat                                    | 1870 - 1934 | Supply of Montevideo (number of animals)                                                                                                                                                                                     | 1870 - 1872: [1]                                        |
|                                               |             |                                                                                                                                                                                                                              | 1873: Statistical Notebook No.8 (1877)                  |
|                                               |             |                                                                                                                                                                                                                              | 1874 - 1905: Statistical Yearbooks of Uruguay           |
|                                               |             |                                                                                                                                                                                                                              | 1906 - 1930: [11]                                       |
|                                               |             |                                                                                                                                                                                                                              | 1931 - 1934: Statistical Yearbooks of Uruguay           |
|                                               |             | Supply of provinces excepting Montevideo (number of animals)                                                                                                                                                                 | 1870 - 1905: [6]                                        |
|                                               |             |                                                                                                                                                                                                                              | 1906 - 1933: [11]                                       |
|                                               |             |                                                                                                                                                                                                                              | 1934: Statistical Yearbooks of Uruguay                  |
|                                               |             | Slaughterhouse (number of animals)                                                                                                                                                                                           | 1870 - 1903: Data not available                         |
|                                               |             |                                                                                                                                                                                                                              | 1904 - 1910: [12]                                       |

|             |             |                                                                  |                                                                                                                                                                     |
|-------------|-------------|------------------------------------------------------------------|---------------------------------------------------------------------------------------------------------------------------------------------------------------------|
|             |             |                                                                  | 1911 - 1934: [11]                                                                                                                                                   |
|             |             |                                                                  |                                                                                                                                                                     |
|             |             | <i>Saladeros and factories slaughter<br/>(number of animals)</i> | 1870 - 1911: Data not available                                                                                                                                     |
|             |             |                                                                  | 1912 - 1934: [11]                                                                                                                                                   |
|             |             | Live sheep exports (number of animals)                           | 1870 - 1875: Statistical Notebook No.8 (1877)                                                                                                                       |
|             |             |                                                                  | 1876: Interpolation                                                                                                                                                 |
|             |             |                                                                  | 1877 - 1878: [2]                                                                                                                                                    |
|             |             |                                                                  | 1879 - 1881: Interpolation                                                                                                                                          |
|             |             |                                                                  | 1882 - 1934: Statistical Yearbooks of Uruguay                                                                                                                       |
|             |             | 1935 – 1960                                                      | Information provided by Prof. L. Bértola                                                                                                                            |
|             |             | 1961 – 2014                                                      | FAOSTAT                                                                                                                                                             |
| Pig<br>meat | 1870 - 1960 | Supply of Montevideo (number of<br>animals)                      | 1870: [2]                                                                                                                                                           |
|             |             |                                                                  | 1871 - 1873: Interpolation                                                                                                                                          |
|             |             |                                                                  | 1874 - 1876: Statistical Yearbooks of Uruguay                                                                                                                       |
|             |             |                                                                  | 1877: Interpolation                                                                                                                                                 |
|             |             |                                                                  | 1878 - 1879: Statistical Yearbooks of Uruguay                                                                                                                       |
|             |             |                                                                  | 1880 - 1881: [2]                                                                                                                                                    |
|             |             |                                                                  | 1882 - 1886: Statistical Yearbooks of Uruguay                                                                                                                       |
|             |             |                                                                  | 1887 - 1889: [2]                                                                                                                                                    |
|             |             |                                                                  | 1890 - 1923: Statistical Yearbooks of Uruguay                                                                                                                       |
|             |             |                                                                  | 1924 - 1935: Statistical Synthesis of the Republic 1929 – 1936                                                                                                      |
|             |             |                                                                  | 1936 - 1941: Statistical Yearbooks of Uruguay                                                                                                                       |
|             |             | Supply of provinces excepting<br>Montevideo (number of animals)  | 1870 - 1905: It was assumed that the variation of the meat consumption of the countryside is equal to the variation of the population of the non-capital provinces. |
|             |             |                                                                  | 1906 - 1960: Statistical Yearbooks of Uruguay                                                                                                                       |
|             |             | Slaughterhouse (number of animals)                               | 1870 - 1916: Data not available                                                                                                                                     |
|             |             |                                                                  | 1917 - 1960: Statistical Yearbooks of Uruguay                                                                                                                       |
|             |             | Factories slaughter (number of animals)                          | 1870 - 1918: Data not available                                                                                                                                     |
|             |             |                                                                  | 1919 - 1960: Statistical Yearbooks of Uruguay                                                                                                                       |
|             |             | Live pig exports (number of animals)                             | 1870 - 1881: It is assumed zero                                                                                                                                     |
|             |             |                                                                  | 1882 - 1960: Statistical Yearbooks of Uruguay                                                                                                                       |
|             |             | 1961 - 2014                                                      | FAOSTAT                                                                                                                                                             |
| Milk        | 1870 - 1929 |                                                                  |                                                                                                                                                                     |

|                 |             |                                                                                                                                                                                                                                                                                                                |
|-----------------|-------------|----------------------------------------------------------------------------------------------------------------------------------------------------------------------------------------------------------------------------------------------------------------------------------------------------------------|
|                 |             | Milk tons are obtained from the bovine stock, estimating the percentage of dairy cattle as 7.10% of the total stock (Statistical Yearbooks of Uruguay), milking cows as 20% of the total dairy cattle and assuming that the total of litres per cow obtained annually is 1,278 (3.5 litres per day). See [14]. |
|                 | 1930 - 1950 | [15]                                                                                                                                                                                                                                                                                                           |
|                 | 1951 - 1960 | Statistical Yearbooks of Uruguay                                                                                                                                                                                                                                                                               |
|                 | 1961 - 2014 | FAOSTAT                                                                                                                                                                                                                                                                                                        |
| <b>Wool</b>     | 1870 - 1880 | The tons of wool are obtained from the sheep stock, estimating the production of wool at 1.6 kg per animal, according to [16].                                                                                                                                                                                 |
|                 | 1881 - 1899 | The tons of wool are obtained from the sheep stock, estimating the production of wool at 1.8 kg per animal, according to [16].                                                                                                                                                                                 |
|                 | 1900 - 1960 | Uruguayan Wool Secretariat                                                                                                                                                                                                                                                                                     |
|                 | 1960 - 2014 | FAOSTAT                                                                                                                                                                                                                                                                                                        |
| <b>Leathers</b> | 1870 - 1960 | The tons of hides are obtained from the stock of cattle and the relationship between extraction of meat and hides between 1961 – 2014 (average).                                                                                                                                                               |
|                 | 1961 - 2014 | FAOSTAT                                                                                                                                                                                                                                                                                                        |
| <b>Eggs</b>     | 1870 - 1960 | The tons of eggs are obtained from the stock of hens and the relationship between the poultry and eggs between 1961 and 2014 (average).                                                                                                                                                                        |
|                 | 1961 - 2014 | FAOSTAT                                                                                                                                                                                                                                                                                                        |

### *Timber and non-timber forest resources*

In some cases, we assume that the production of certain components is zero prior to a given year. It is an assumption that aims to show that if there was production in those years, it was marginal. In the absence of data from statistical sources, a probably "downward" estimate is better than its opposite (we offer “conservative estimates”).

| Item | Period      | Assumptions and Sources |
|------|-------------|-------------------------|
|      | 1870 - 1935 | It is assumed at zero   |
|      | 1936 - 1954 |                         |

|                                                 |                    |                                                                                                                                                                                                                                                               |
|-------------------------------------------------|--------------------|---------------------------------------------------------------------------------------------------------------------------------------------------------------------------------------------------------------------------------------------------------------|
| <b>Conifer industrial round wood (m³)</b>       |                    | The first accurate production data is 100,000 m³ for 1955. There is no information about wood industry before 1936. See Industrial Census of Uruguay 1936.                                                                                                    |
|                                                 | <b>1955 - 1956</b> | World Forest Inventory 1958                                                                                                                                                                                                                                   |
|                                                 | <b>1957</b>        | Interpolation                                                                                                                                                                                                                                                 |
|                                                 | <b>1958</b>        | World Forest Inventory 1958                                                                                                                                                                                                                                   |
|                                                 | <b>1959 -1960</b>  | Interpolation                                                                                                                                                                                                                                                 |
|                                                 | <b>1961 - 2014</b> | FORESTAT                                                                                                                                                                                                                                                      |
| <b>Non-coniferous industrial roundwood (m³)</b> | <b>1870 - 1935</b> | It is assumed at zero                                                                                                                                                                                                                                         |
|                                                 | <b>1936 - 1960</b> | The first accurate data of the production is 85,000 m³ for 1961. There is no information about wood industry before 1936. See Industrial Census of Uruguay 1936.                                                                                              |
|                                                 | <b>1960 - 2014</b> | FORESTAT                                                                                                                                                                                                                                                      |
| <b>Fuelwood (m³)</b>                            | <b>1870 - 1882</b> | The available series of wood for fuel begins in the year 1882. It is reasonable that in the previous twelve years it has remained similar to the value of that year. It is assumed constant at the level of 1882.                                             |
|                                                 | <b>1882 - 1960</b> | It is assumed that the evolution of wood production for fuel is equal to the evolution of wood consumption. Data from [17]                                                                                                                                    |
|                                                 | <b>1961 - 1989</b> | FORESTAT                                                                                                                                                                                                                                                      |
|                                                 | <b>1990 - 2014</b> | Data provided by the General Forest Directorate.                                                                                                                                                                                                              |
| <b>Increase (m³)</b>                            | <b>1870 - 2014</b> | It is assumed that forests grow by more than the production of each year. This assumption is based on the information provided by specialists from the Forest Directorate who consider that Uruguayan fuelwood did not experience problems of sustainability. |
| <b>Forest Area Stock (ha)</b>                   | <b>1870 - 1907</b> | The first accurate data of the forest area corresponds to 1908. No evidence has been found to confirm the occurrence of changes during the previous decades, which is why it is assumed that this value remained constant during the previous years.          |
|                                                 | <b>1908</b>        | Agricultural Statistics 1916                                                                                                                                                                                                                                  |
|                                                 | <b>1909 - 1936</b> | Interpolation                                                                                                                                                                                                                                                 |

|  |             |                                                            |
|--|-------------|------------------------------------------------------------|
|  | 1937        | Agricultural Census 1937                                   |
|  | 1938 - 1942 | Interpolation                                              |
|  | 1943        | Agricultural Census 1943                                   |
|  | 1944        | Compilation of Agricultural Statistics 1948 - 1950         |
|  | 1945        | Interpolation                                              |
|  | 1946        | Compilation of Agricultural Statistics 1948 - 1950         |
|  | 1947 - 1948 | Interpolation                                              |
|  | 1949        | Statistical synthesis until 1949                           |
|  | 1950        | Interpolation                                              |
|  | 1951        | World Forestry Resources 1953                              |
|  | 1952 - 1955 | Interpolation                                              |
|  | 1956        | World Forest Inventory 1958                                |
|  | 1957 - 1960 | Interpolation                                              |
|  | 1961        | World Forest Inventory 1963                                |
|  | 1962 - 1964 | Interpolation                                              |
|  | 1965        | World Forest Inventory 1970                                |
|  | 1966 - 1979 | Interpolation                                              |
|  | 1980        | World Forest Inventory 1988                                |
|  | 1981 - 1984 | Interpolation                                              |
|  | 1985 - 1987 | World Forest Inventory 1988                                |
|  | 1988 - 1989 | Interpolation                                              |
|  | 1990 - 2011 | FORESTAT                                                   |
|  | 2012        | General Forestry Office - Evaluation and Information. 2013 |
|  | 2012 - 2014 | It is assumed equal to data corresponding of 2012          |

### Minerals

| Item     | Period      | Assumptions and Sources                                                                                                                                                                                   |
|----------|-------------|-----------------------------------------------------------------------------------------------------------------------------------------------------------------------------------------------------------|
| Everyone | 1870 - 1960 | In the absence of data for the years prior to 1960, it is assumed that the value of total mining production moves in the same way as the output of the Mining sector (at constant 2005 prices). See [18]. |
|          | 1961 - 1976 | [19]                                                                                                                                                                                                      |
|          | 1977 - 2014 | DINAMIGE                                                                                                                                                                                                  |

### References

1. Vaillant, A. *Apuntes estadísticos y mercantiles sobre la República Oriental del Uruguay*. Imprenta Nacional: Montevideo, Uruguay, 1873.
2. Acevedo, E. *Anales históricos del Uruguay*. Barreiro y Ramos: Montevideo, Uruguay, 1934.
3. ACA. *Historia del arroz en Uruguay*. Documento informativo: Montevideo, Uruguay.
4. Bertino, M.; Millot, J. *Historia Económica del Uruguay*. Fundación de Cultura Universitaria: Montevideo, Uruguay, 1996.

5. Bringas, M. La productividad de la tierra en la Corona de Castilla a mediados del siglo XVIII. In *Campo y campesinos en la España Moderna. Culturas políticas en el mundo hispano*, Perez, M.; Rubio, L.; García, A., Eds.; Fundación Española de Historia Moderna: Madrid, España, 2012.
6. Bértola, L. *El PBI de Uruguay 1870 – 1936 y otras estimaciones*. Facultad de Ciencias Sociales: Montevideo, Uruguay, 1998.
7. Bertino, M. La industria textil uruguaya 1900 – 1960. América Latina en la Historia Económica: México DF, México, 2009.
8. Arbelo, A.; Ponce, M. El girasol en el Uruguay. Análisis de la NIC 41 agricultura y su aplicación en la contabilización del cultivo. Bachelor's degree, Uruguay, 2011.
9. Millot, J.; Bertino, M. *Historia económica del Uruguay*. Fundación de Cultura Universitaria: Montevideo, Uruguay, 1991.
10. Moraes, I. Las determinantes tecnológicas e institucionales del desempeño ganadero en el largo plazo, 1870-1970. Master's degree. Universidad de la República, Uruguay, 2001.
11. Ruano-Fourner, A. *Estudio económico de la producción de las carnes del Río de la Plata*. Peña y Cía: Buenos Aires, Argentina, 1936.
12. Barrán, J.; Nahúm, B. *Historia rural del Uruguay moderno*. Ediciones de la Banda Oriental: Montevideo, Uruguay, 1967.
13. Muñoz-Durán, R. *Los mercados de carnes del Río de la Plata*. BROU, Montevideo, Uruguay, 1968.
14. Bertino, M.; Tajam, H. La agroindustria láctea en el Uruguay 1911 – 1943. *Instituto de Economía. Facultad de Ciencias Económicas y Administración* 2000.
15. Echegaray, A. Plusvalía agropecuaria en el Uruguay, 1930 – 1954. *Instituto de Economía. Facultad de Ciencias Económicas y Administración* 1971.
16. Álvarez, J. Instituciones, cambio tecnológico y distribución del ingreso: una comparación del desempeño económico de Nueva Zelanda y Uruguay (1870-1940). Master's degree. Universidad de la República, Uruguay, 2008.
17. Bertoni, R. Energía y desarrollo. La restricción energética en Uruguay como problema: 1882-2000. CSIC 2011.
18. Bonino, N., Román, C. and Willebald, H. Structural change and long-term patterns. A methodological proposal for Uruguay in the very long run. Paper presented in the Seminario de Investigación, Programa de Historia Económica y Social, PHES-FCS-UdelaR, Montevideo, Uruguay, Sep-6, 2012
19. Bossi, J.; Navarro, R. *Recursos minerales del Uruguay*. Jorge Bossi: Montevideo, Uruguay, 2000.
